# Supplementary material
Source: HighWire-hosted journal article supplement (https://jnis.bmj.com/content/15/5/473)
Supplement: inline-supplementary-material-1 [file inline-supplementary-material-1.pdf]

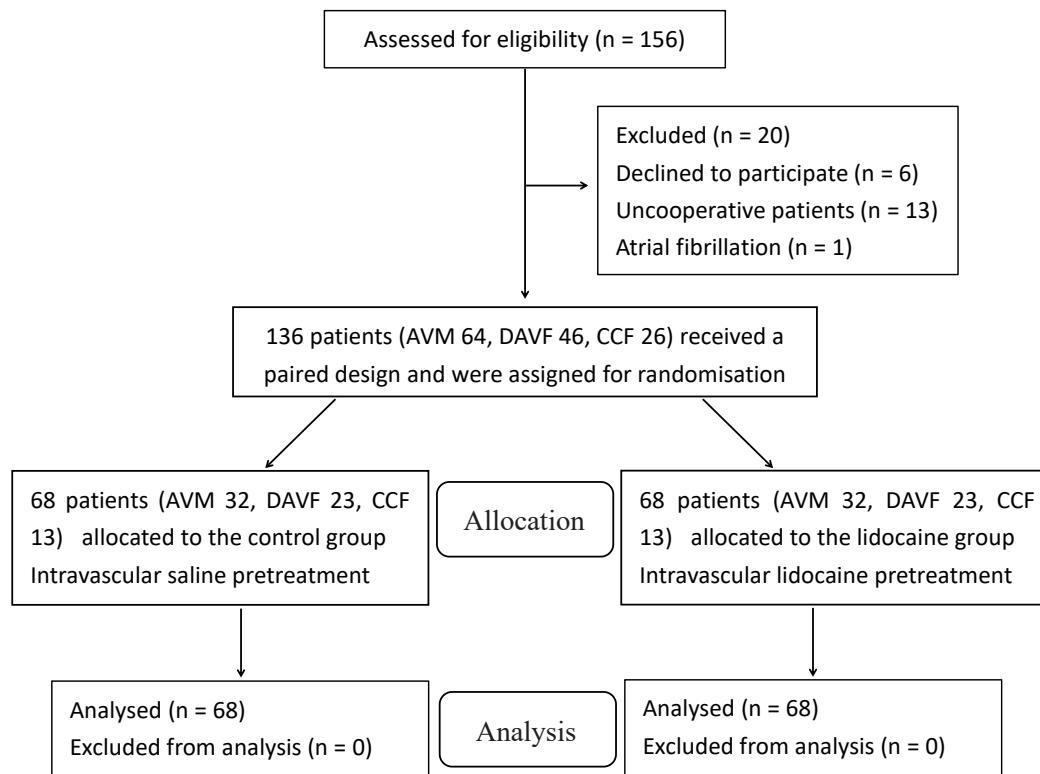

**Supplementary Figure 1. Flow of participants through the study.**

**Supplementary Table 1. Description of the 12 cases who suffered TCR during embolization**

| Cases   | Diagnosis | Comorbidity            | Vessel of Embolization  | HR | MAP | Treatment Approach         | TCR Type |
|---------|-----------|------------------------|-------------------------|----|-----|----------------------------|----------|
| Case 1  | DAVF      | None                   | Middle meningeal artery | 0  | 0   | CPR                        | IV a     |
| Case 2  | CCF       | Bradycardia            | Cavernous sinus         | 0  | 0   | Atropine                   | IV a     |
| Case 3  | DAVF      | Hypertension           | Middle meningeal artery | 0  | 0   | Atropine, CPR, Epinephrine | IV a     |
| Case 4  | DAVF      | Diabetes               | Middle meningeal artery | 33 | 55  | Atropine                   | IV a     |
| Case 5  | DAVF      | None                   | Middle meningeal artery | 31 | 51  | Atropine                   | IV a     |
| Case 6  | DAVF      | None                   | Middle meningeal artery | 36 | 62  | Atropine                   | IV a     |
| Case 7  | CCF       | Bradycardia            | Cavernous sinus         | 38 | 67  | Atropine                   | IV a     |
| Case 8  | DAVF      | None                   | Middle meningeal artery | 42 | 105 | N/A                        | IV b     |
| Case 9  | CCF       | Hypertension           | Cavernous sinus         | 41 | 121 | N/A                        | IV b     |
| Case 10 | DAVF      | None                   | Occipital artery        | 42 | 110 | N/A                        | IV b     |
| Case 11 | DAVF      | None                   | Vertebral artery branch | 45 | 103 | N/A                        | IV b     |
| Case 12 | DAVF      | Hypertension, Diabetes | Middle meningeal artery | 46 | 122 | N/A                        | IV b     |

HR was the slowest with MAP recoded accordingly when TCR occurred during intra-arterial embolization. TCR type was defined according to the new classification scheme according to the onset of HR reduction [17]: IVa is defined when HR reduction appears early than MAP alteration and IVb type is classified if HR reduction follows MAP alteration.

N/A, not applicable.

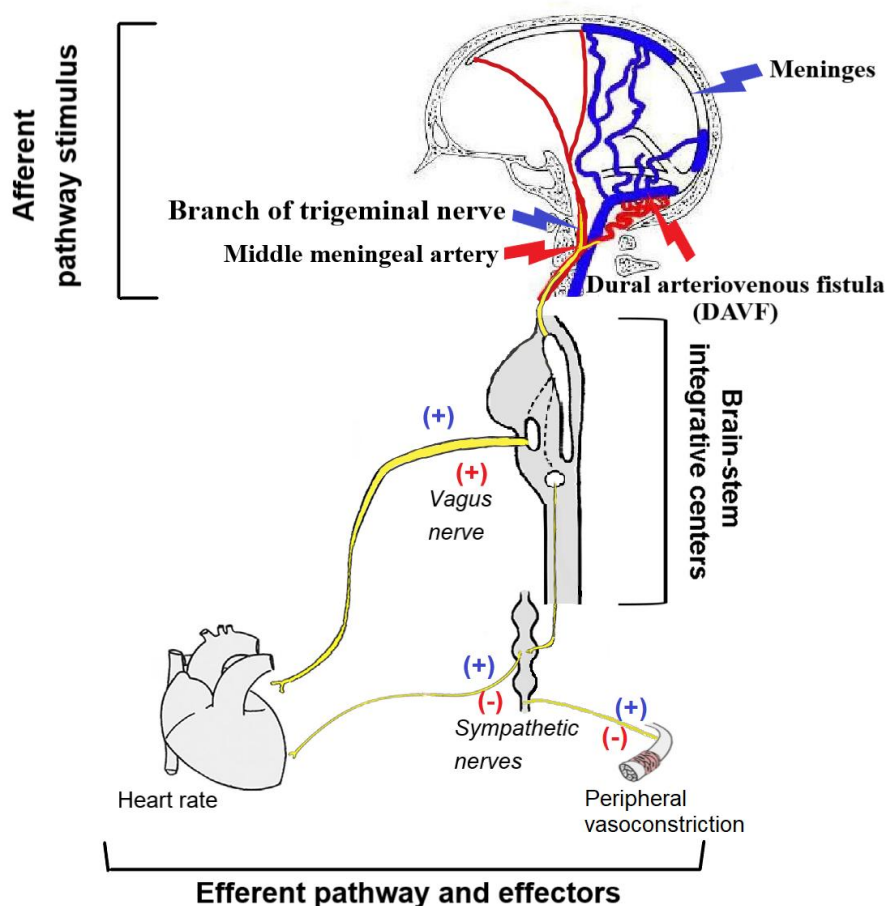

**Supplementary Figure 2. Schematic illustration of the autonomic neural pathway and effector activated as a consequence of trigeminal nerve stimulation triggered by meningeal vascular stimulus during DMSO/Onyx injection.**

Endovascular embolization induced TCR is that signals triggered by central stimulation are sent to brainstem integrative centers including the sensory nucleus of the trigeminal nerve, the short internuncial nerve fibers in the reticular formation, and the efferent pathway in the motor nucleus of the vagus nerve and nucleus ambiguus. The fibers of the vagus or sympathetic nerves end in the myocardium and peripheral blood vessels, leading to autonomic changes that usually manifest as a negative chronotropy, or occasionally bradycardia with increased blood pressure. Patients with DAVF and the middle meningeal artery as a major supplying vessel to the lesion site are more likely to experience TCR with bradycardia and hypotension or hypertension.
